# Supplementary material for: Computational Insight into Protein Tyrosine Phosphatase 1B Inhibition: A Case Study of the Combined Ligand- and Structure-Based Approach
Source: Hindawi journal article supplement (doi:10.1155/2017/4245613), 2017-01-01
Supplement: f1 [file 4245613.f1.pdf]

## *Supplementary Material*

**Figure S1.** The binding pockets of the PTP1B, which is shown in surface mode labeled with training set: **1** (A), **2** (B), **3** (C), **4** (D), **5** (E), **6** (F), **7** (G), **8** (H), **9** (I), **10** (J), **11** (K), **12** (L), **13** (M), **14** (N), **15** (O) and **16** (P). Each compound was showed by different colors. Protein: hydrophobic residues (blue) and hydrophilic residues (red). The pictures were prepares using PyMol.

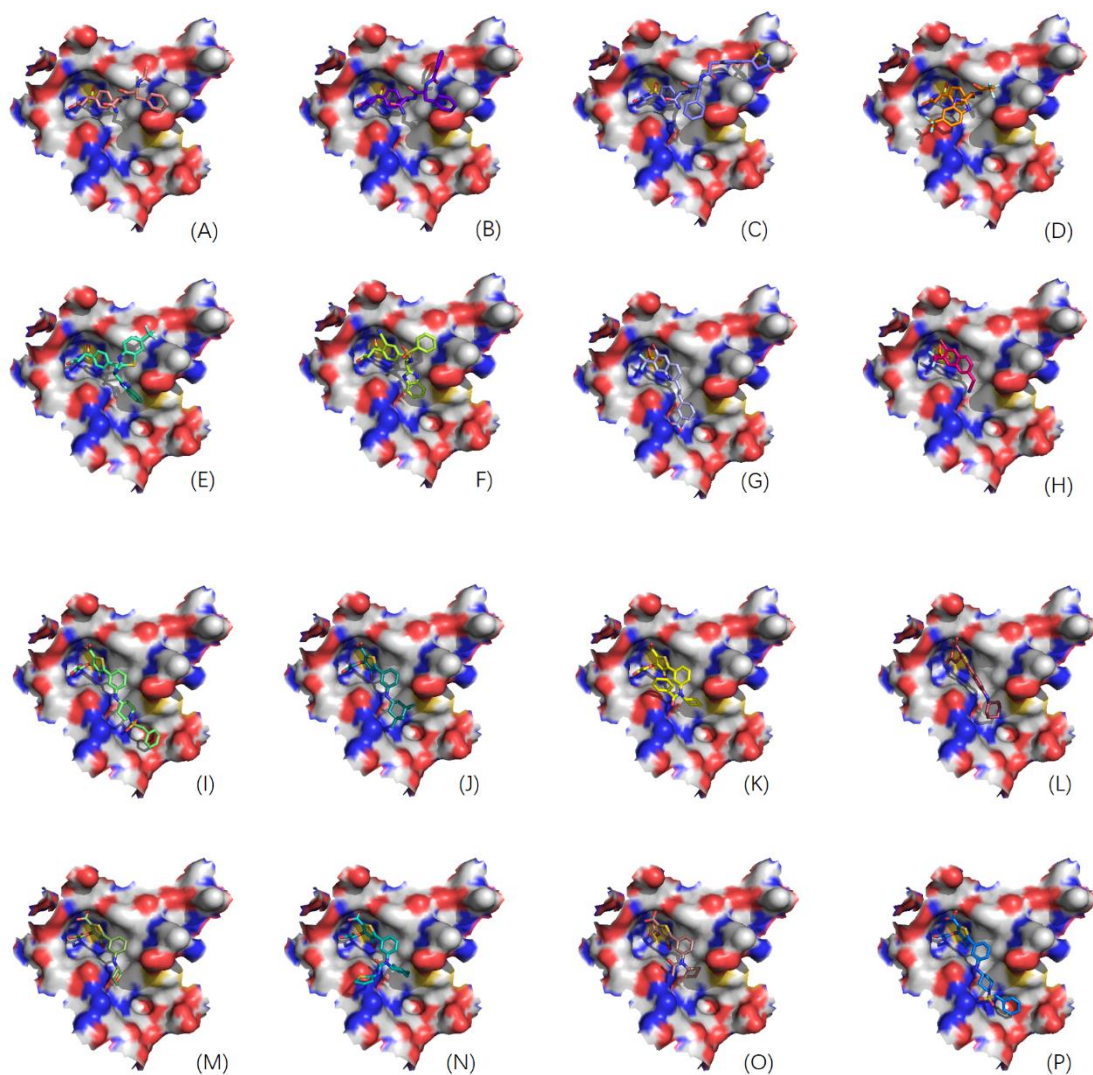

**Figure S2.** Docking of compounds **1** (A), **2** (B), **3** (C), **4** (D), **5** (E), **6** (F), **7** (G), **8** (H), **9** (I), **10** (J), **11** (K), **12** (L), **13** (M), **14** (N), **15** (O) and **16** (P) into the active site of PTP1B with key amino acid residues in all ligand binding poses. The key amino acid residues: nitrogen (blue), oxygen (red), carbon (green) and sulfur (gold). Compounds: nitrogen (blue), oxygen (red), carbon (white) and sulfur (gold). The pictures were prepared using PyMol.

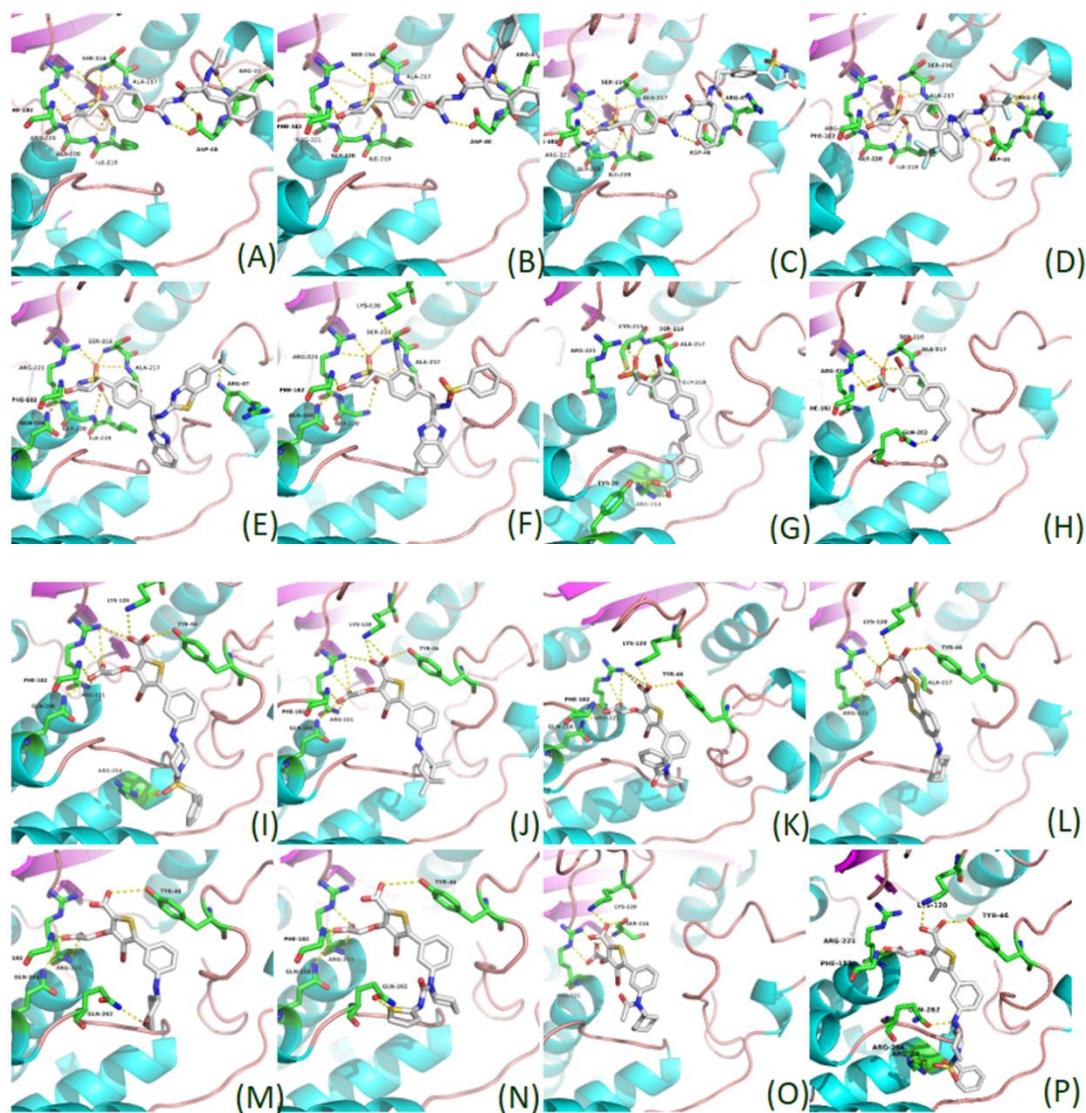

**Table S1.** AutoDock 4, XP, and SP binding scores (kcal/mol) for docking studies of the training set.

| Compound | IC <sub>50</sub> (nM) | Ki (nM) | autodock |        | SP Glide |       | XP Glide |        |
|----------|-----------------------|---------|----------|--------|----------|-------|----------|--------|
|          |                       |         | 2CMA     | 2QBP   | 2CMA     | 2QBP  | 2CMA     | 2QBP   |
| 1        | 210                   |         | -12.05   | -9.83  | -8.9     | -4.71 | -8.87    | -7.28  |
| 2        | 185                   |         | -12.37   | -10.34 | -8.69    | -4.05 | -8.15    | -5.23  |
| 3        | 65                    |         | -12.43   | -11.33 | -10      | -4.05 | -10.4    | -5.03  |
| 4        | 110                   |         | -10.97   | -9.84  | -8.66    | -4.26 | -8.88    | -6.94  |
| 5        | 330                   |         | -11.96   | -11.17 | -9.06    | -5.36 | -9.15    | -6.98  |
| 6        | 31                    |         | -13.07   | -11.98 | -8.47    | -4.54 | -9.61    | -5.96  |
| 7        | 7                     |         | -10.37   | -11.74 | -7.33    | -4.24 | -6.72    | -9.22  |
| 8        | 90                    |         | -8.02    | -9.06  | -8.11    | -8.82 | -6.23    | -7.06  |
| 9        |                       | 36      | -9.15    | -11.23 | -5.82    | -8.39 | -8.31    | -11.1  |
| 10       |                       | 4       | -9.91    | -12.24 | -5.55    | -9.16 | -7.37    | -10.33 |
| 11       |                       | 13      | -9.64    | -10.67 | -5.32    | -8.11 | -3.89    | -9.72  |
| 12       |                       | 740     | -9.11    | -10.64 | -5.96    | -9.28 | -7.24    | -9.97  |
| 13       |                       | 310     | -8.74    | -10.51 | -5.38    | -8.68 | -6.9     | -10.54 |
| 14       |                       | 21      | -8.98    | -10.73 | -5.56    | -8.7  | -7.07    | -10.27 |
| 15       |                       | 22      | -8.99    | -10.61 | -5.14    | -8.87 | -7.19    | -10.02 |
| 16       |                       | 0.68    | -9.85    | -12.29 | -5.86    | -9.13 | -8.12    | -9.23  |

**Table S2.** Non-bond interaction of each compound (training set) in PTP1B active sites.

| Non-bond interaction of <b>Compound 1</b> |          |               |                            |               |                |              |              |
|-------------------------------------------|----------|---------------|----------------------------|---------------|----------------|--------------|--------------|
| Name                                      | Distance | Category      | Types                      | From          | From chemistry | To           | To chemistry |
| d:RES1:S1 - A:ASP181:OD2                  | 3.45464  | Electrostatic | Attractive Charge          | d:RES1:S1     | Positive       | A:ASP181:OD2 | Negative     |
| A:ARG47:HN - d:RES1:O34                   | 1.76859  | Hydrogen Bond | Conventional Hydrogen Bond | A:ARG47:HN    | H-Donor        | d:RES1:O34   | H-Acceptor   |
| A:SER216:HN - d:RES1:O14                  | 1.91355  | Hydrogen Bond | Conventional Hydrogen Bond | A:SER216:HN   | H-Donor        | d:RES1:O14   | H-Acceptor   |
| A:ALA217:HN - d:RES1:O13                  | 2.30907  | Hydrogen Bond | Conventional Hydrogen Bond | A:ALA217:HN   | H-Donor        | d:RES1:O13   | H-Acceptor   |
| A:GLY218:HN - d:RES1:O13                  | 2.95127  | Hydrogen Bond | Conventional Hydrogen Bond | A:GLY218:HN   | H-Donor        | d:RES1:O13   | H-Acceptor   |
| A:ILE219:HN - d:RES1:O13                  | 2.69185  | Hydrogen Bond | Conventional Hydrogen Bond | A:ILE219:HN   | H-Donor        | d:RES1:O13   | H-Acceptor   |
| A:GLY220:HN - d:RES1:O13                  | 2.36031  | Hydrogen Bond | Conventional Hydrogen Bond | A:GLY220:HN   | H-Donor        | d:RES1:O13   | H-Acceptor   |
| A:ARG221:HE - d:RES1:O14                  | 2.83706  | Hydrogen Bond | Conventional Hydrogen Bond | A:ARG221:HE   | H-Donor        | d:RES1:O14   | H-Acceptor   |
| A:ARG221:HH21 - d:RES1:O14                | 1.77613  | Hydrogen Bond | Conventional Hydrogen Bond | A:ARG221:HH21 | H-Donor        | d:RES1:O14   | H-Acceptor   |
| A:GLN266:HE22 - d:RES1:O12                | 1.92299  | Hydrogen Bond | Conventional Hydrogen Bond | A:GLN266:HE22 | H-Donor        | d:RES1:O12   | H-Acceptor   |

|                             |             |                      |                                       |                     |                 |                 |                |
|-----------------------------|-------------|----------------------|---------------------------------------|---------------------|-----------------|-----------------|----------------|
| d:RES1:H35 -<br>A:CYS215:SG | 2.806<br>84 | Hydro<br>gen<br>Bond | Conventi<br>onal<br>Hydroge<br>n Bond | d:RES<br>1:H35      | H-<br>Donor     | A:CYS215:<br>SG | H-<br>Acceptor |
| d:RES1:H46 -<br>A:ASP48:OD1 | 1.823<br>46 | Hydro<br>gen<br>Bond | Conventi<br>onal<br>Hydroge<br>n Bond | d:RES<br>1:H46      | H-<br>Donor     | A:ASP48:<br>OD1 | H-<br>Acceptor |
| d:RES1:H47 -<br>A:ASP48:OD2 | 1.847<br>41 | Hydro<br>gen<br>Bond | Conventi<br>onal<br>Hydroge<br>n Bond | d:RES<br>1:H47      | H-<br>Donor     | A:ASP48:<br>OD2 | H-<br>Acceptor |
| A:ASP48:OD2<br>- d:RES1     | 3.698<br>39 | Electro<br>static    | Pi-Anion                              | A:ASP<br>48:OD<br>2 | Negativ<br>e    | d:RES1          | Pi-Orbitals    |
| A:ALA217:CB -<br>d:RES1     | 3.619<br>34 | Hydro<br>phobic      | Pi-<br>Sigma                          | A:ALA<br>217:C<br>B | C-H             | d:RES1          | Pi-Orbitals    |
| A:PHE182 -<br>d:RES1        | 4.749<br>72 | Hydro<br>phobic      | Pi-Pi<br>Stacked                      | A:PHE<br>182        | Pi-<br>Orbitals | d:RES1          | Pi-Orbitals    |
| d:RES1 -<br>A:ARG47         | 5.072<br>19 | Hydro<br>phobic      | Pi-Alkyl                              | d:RES<br>1          | Pi-<br>Orbitals | A:ARG47         | Alkyl          |

#### Non-bond interaction of **Compound 2**

| Name                        | Distance    | Category             | Types                                 | From                | From chemistry | To               | To chemistry   |
|-----------------------------|-------------|----------------------|---------------------------------------|---------------------|----------------|------------------|----------------|
| d:RES1:S1 -<br>A:ASP181:OD2 | 3.604<br>96 | Electro<br>static    | Attractive<br>Charge                  | d:RES<br>1:S1       | Positive       | A:ASP181:<br>OD2 | Negative       |
| A:ARG47:HN -<br>d:RES1:O34  | 1.713<br>44 | Hydro<br>gen<br>Bond | Conventi<br>onal<br>Hydroge<br>n Bond | A:ARG<br>47:HN      | H-<br>Donor    | d:RES1:O<br>34   | H-<br>Acceptor |
| A:PHE182:HN<br>- d:RES1:O12 | 2.668<br>28 | Hydro<br>gen<br>Bond | Conventi<br>onal<br>Hydroge<br>n Bond | A:PHE<br>182:H<br>N | H-<br>Donor    | d:RES1:O<br>12   | H-<br>Acceptor |
| A:SER216:HN<br>- d:RES1:O14 | 1.762<br>42 | Hydro<br>gen<br>Bond | Conventi<br>onal<br>Hydroge<br>n Bond | A:SER<br>216:H<br>N | H-<br>Donor    | d:RES1:O<br>14   | H-<br>Acceptor |
| A:GLY218:HN<br>- d:RES1:O13 | 2.956<br>32 | Hydro<br>gen         | Conventi<br>onal                      | A:GLY<br>218:H      | H-<br>Donor    | d:RES1:O<br>13   | H-<br>Acceptor |

|                           |         |               |                            |               |             |             |             |
|---------------------------|---------|---------------|----------------------------|---------------|-------------|-------------|-------------|
|                           |         | Bond          | Hydrogen Bond              | N             |             |             |             |
| A:ILE219:HN - d:RES1:O13  | 2.57797 | Hydrogen Bond | Conventional Hydrogen Bond | A:ILE219:HN   | H-Donor     | d:RES1:O13  | H-Acceptor  |
| A:GLY220:HN - d:RES1:O13  | 2.23505 | Hydrogen Bond | Conventional Hydrogen Bond | A:GLY220:HN   | H-Donor     | d:RES1:O13  | H-Acceptor  |
| A:ARG221:HH21d:RES1:O14   | 2.05775 | Hydrogen Bond | Conventional Hydrogen Bond | A:ARG221:HH21 | H-Donor     | d:RES1:O14  | H-Acceptor  |
| A:GLN266:HE22- d:RES1:O12 | 2.0268  | Hydrogen Bond | Conventional Hydrogen Bond | A:GLN266:HE22 | H-Donor     | d:RES1:O12  | H-Acceptor  |
| d:RES1:H51 - A:ASP48:OD2  | 1.6607  | Hydrogen Bond | Conventional Hydrogen Bond | d:RES1:H51    | H-Donor     | A:ASP48:OD2 | H-Acceptor  |
| d:RES1:H52 - A:ASP48:OD2  | 1.72351 | Hydrogen Bond | Conventional Hydrogen Bond | d:RES1:H52    | H-Donor     | A:ASP48:OD2 | H-Acceptor  |
| A:ASP48:OD2 - d:RES1      | 3.3938  | Electrostatic | Pi-Anion                   | A:ASP48:OD2   | Negative    | d:RES1      | Pi-Orbitals |
| A:ALA217:CB - d:RES1      | 3.68542 | Hydrophobic   | Pi-Sigma                   | A:ALA217:CB   | C-H         | d:RES1      | Pi-Orbitals |
| A:ARG45:O - d:RES1        | 2.9981  | Other         | Pi-Lone Pair               | A:ARG45:O     | Lone Pair   | d:RES1      | Pi-Orbitals |
| A:PHE182 - d:RES1         | 4.68612 | Hydrophobic   | Pi-Pi Stacked              | A:PHE182      | Pi-Orbitals | d:RES1      | Pi-Orbitals |

#### Non-bond interaction of **Compound 3**

| Name        | Distance | Category | Types      | From  | From chemistry | To        | To chemistry |
|-------------|----------|----------|------------|-------|----------------|-----------|--------------|
| d:RES1:S1 - | 3.718    | Electro  | Attractive | d:RES | Positive       | A:ASP181: | Negative     |

|                                   |             |                      |                                       |                       |             |                  |                |
|-----------------------------------|-------------|----------------------|---------------------------------------|-----------------------|-------------|------------------|----------------|
| A:ASP181:OD2                      | 23          | static               | e Charge                              | 1:S1                  |             | OD2              |                |
| A:LYS36:HZ1 -<br>d:RES1:O46       | 1.640<br>71 | Hydro<br>gen<br>Bond | Conventi<br>onal<br>Hydroge<br>n Bond | A:LYS<br>36:HZ<br>1   | H-<br>Donor | d:RES1:O<br>46   | H-<br>Acceptor |
| A:PHE182:HN<br>- d:RES1:O12       | 2.370<br>61 | Hydro<br>gen<br>Bond | Conventi<br>onal<br>Hydroge<br>n Bond | A:PHE<br>182:H<br>N   | H-<br>Donor | d:RES1:O<br>12   | H-<br>Acceptor |
| A:SER216:HN<br>- d:RES1:O14       | 2.370<br>16 | Hydro<br>gen<br>Bond | Conventi<br>onal<br>Hydroge<br>n Bond | A:SER<br>216:H<br>N   | H-<br>Donor | d:RES1:O<br>14   | H-<br>Acceptor |
| A:GLY218:HN<br>- d:RES1:O13       | 2.584<br>35 | Hydro<br>gen<br>Bond | Conventi<br>onal<br>Hydroge<br>n Bond | A:GLY<br>218:H<br>N   | H-<br>Donor | d:RES1:O<br>13   | H-<br>Acceptor |
| A:ILE219:HN -<br>d:RES1:O13       | 2.264<br>39 | Hydro<br>gen<br>Bond | Conventi<br>onal<br>Hydroge<br>n Bond | A:ILE2<br>19:HN       | H-<br>Donor | d:RES1:O<br>13   | H-<br>Acceptor |
| A:GLY220:HN<br>- d:RES1:O13       | 2.119<br>46 | Hydro<br>gen<br>Bond | Conventi<br>onal<br>Hydroge<br>n Bond | A:GLY<br>220:H<br>N   | H-<br>Donor | d:RES1:O<br>13   | H-<br>Acceptor |
| A:ARG221:HH<br>21 -<br>d:RES1:O14 | 2.202<br>83 | Hydro<br>gen<br>Bond | Conventi<br>onal<br>Hydroge<br>n Bond | A:ARG<br>221:H<br>H21 | H-<br>Donor | d:RES1:O<br>14   | H-<br>Acceptor |
| A:GLN266:HE2<br>2 -<br>d:RES1:O12 | 2.157<br>48 | Hydro<br>gen<br>Bond | Conventi<br>onal<br>Hydroge<br>n Bond | A:GLN<br>266:H<br>E22 | H-<br>Donor | d:RES1:O<br>12   | H-<br>Acceptor |
| d:RES1:O13 -<br>A:CYS215:SG       | 2.619<br>59 | Hydro<br>gen<br>Bond | Conventi<br>onal<br>Hydroge<br>n Bond | d:RES<br>1:O13        | H-<br>Donor | A:CYS215:<br>SG  | H-<br>Acceptor |
| d:RES1:O14 -<br>A:ASP181:OD2      | 3.101<br>97 | Hydro<br>gen<br>Bond | Conventi<br>onal<br>Hydroge<br>n Bond | d:RES<br>1:O14        | H-<br>Donor | A:ASP181:<br>OD2 | H-<br>Acceptor |
| d:RES1:H59 -<br>A:ASP48:OD2       | 2.009<br>14 | Hydro<br>gen<br>Bond | Conventi<br>onal<br>Hydroge           | d:RES<br>1:H59        | H-<br>Donor | A:ASP48:<br>OD2  | H-<br>Acceptor |

|                          |         |               |                            |             |             |             |             |
|--------------------------|---------|---------------|----------------------------|-------------|-------------|-------------|-------------|
|                          |         |               | n Bond                     |             |             |             |             |
| d:RES1:H62 - A:ASP48:OD2 | 2.75655 | Hydrogen Bond | Conventional Hydrogen Bond | d:RES1:H62  | H-Donor     | A:ASP48:OD2 | H-Acceptor  |
| d:RES1:O46 - A:ARG47:O   | 2.73088 | Hydrogen Bond | Conventional Hydrogen Bond | d:RES1:O46  | H-Donor     | A:ARG47:O   | H-Acceptor  |
| A:SER216:CB - d:RES1:O14 | 3.17211 | Hydrogen Bond | Carbon Hydrogen Bond       | A:SER216:CB | H-Donor     | d:RES1:O14  | H-Acceptor  |
| A:ARG47:NH1 - d:RES1     | 4.37281 | Electrostatic | Pi-Cation                  | A:ARG47:NH1 | Positive    | d:RES1      | Pi-Orbitals |
| A:ASP48:OD2 - d:RES1     | 4.30795 | Electrostatic | Pi-Anion                   | A:ASP48:OD2 | Negative    | d:RES1      | Pi-Orbitals |
| A:ASP48:CB - d:RES1      | 3.41959 | Hydrophobic   | Pi-Sigma                   | A:ASP48:CB  | C-H         | d:RES1      | Pi-Orbitals |
| A:PHE182 - d:RES1        | 5.24876 | Hydrophobic   | Pi-Pi Stacked              | A:PHE182    | Pi-Orbitals | d:RES1      | Pi-Orbitals |
| d:RES1 - A:ALA217        | 3.34089 | Hydrophobic   | Pi-Alkyl                   | d:RES1      | Pi-Orbitals | A:ALA217    | Alkyl       |
| d:RES1 - A:ILE219        | 5.41557 | Hydrophobic   | Pi-Alkyl                   | d:RES1      | Pi-Orbitals | A:ILE219    | Alkyl       |
| d:RES1 - A:ARG47         | 4.73972 | Hydrophobic   | Pi-Alkyl                   | d:RES1      | Pi-Orbitals | A:ARG47     | Alkyl       |

#### Non-bond interaction of **Compound 4**

| Name                     | Distance | Category      | Types                      | From        | From chemistry | To           | To chemistry |
|--------------------------|----------|---------------|----------------------------|-------------|----------------|--------------|--------------|
| d:RES1:S1 - A:ASP181:OD2 | 3.66699  | Electrostatic | Attractive Charge          | d:RES1:S1   | Positive       | A:ASP181:OD2 | Negative     |
| A:PHE182:HN - d:RES1:O12 | 2.19055  | Hydrogen Bond | Conventional Hydrogen Bond | A:PHE182:HN | H-Donor        | d:RES1:O12   | H-Acceptor   |
| A:SER216:HN - d:RES1:O14 | 1.71836  | Hydrogen Bond | Conventional Hydrogen Bond | A:SER216:HN | H-Donor        | d:RES1:O14   | H-Acceptor   |



|                                   |             |                                      |                                                                     |                       |                                         |                |                            |
|-----------------------------------|-------------|--------------------------------------|---------------------------------------------------------------------|-----------------------|-----------------------------------------|----------------|----------------------------|
| A:ALA217:HN<br>- d:RES1:O14       | 2.096<br>84 | Hydro<br>gen<br>Bond                 | Conventi<br>onal<br>Hydroge<br>n Bond                               | A:ALA<br>217:H<br>N   | H-<br>Donor                             | d:RES1:O<br>14 | H-<br>Acceptor             |
| A:GLY218:HN<br>- d:RES1:O13       | 3.051<br>06 | Hydro<br>gen<br>Bond                 | Conventi<br>onal<br>Hydroge<br>n Bond                               | A:GLY<br>218:H<br>N   | H-<br>Donor                             | d:RES1:O<br>13 | H-<br>Acceptor             |
| A:ILE219:HN -<br>d:RES1:O13       | 2.445<br>23 | Hydro<br>gen<br>Bond                 | Conventi<br>onal<br>Hydroge<br>n Bond                               | A:ILE2<br>19:HN       | H-<br>Donor                             | d:RES1:O<br>13 | H-<br>Acceptor             |
| A:GLY220:HN<br>- d:RES1:O13       | 1.938<br>14 | Hydro<br>gen<br>Bond                 | Conventi<br>onal<br>Hydroge<br>n Bond                               | A:GLY<br>220:H<br>N   | H-<br>Donor                             | d:RES1:O<br>13 | H-<br>Acceptor             |
| A:ARG221:HH<br>21 -<br>d:RES1:O14 | 2.273<br>33 | Hydro<br>gen<br>Bond                 | Conventi<br>onal<br>Hydroge<br>n Bond                               | A:ARG<br>221:H<br>H21 | H-<br>Donor                             | d:RES1:O<br>14 | H-<br>Acceptor             |
| A:ARG254:HH<br>21 -<br>d:RES1:F36 | 2.387<br>12 | Hydro<br>gen<br>Bond;<br>Halog<br>en | Conventi<br>onal<br>Hydroge<br>n Bond;Hal<br>ogen<br>(Fluorine<br>) | A:ARG<br>254:H<br>H21 | H-<br>Donor;H<br>alogen<br>Accepto<br>r | d:RES1:F3<br>6 | H-<br>Acceptor;<br>Halogen |
| A:ARG254:HH<br>22 -<br>d:RES1:F34 | 2.454<br>5  | Hydro<br>gen<br>Bond;<br>Halog<br>en | Conventi<br>onal<br>Hydroge<br>n Bond;Hal<br>ogen<br>(Fluorine<br>) | A:ARG<br>254:H<br>H22 | H-<br>Donor;H<br>alogen<br>Accepto<br>r | d:RES1:F3<br>4 | H-<br>Acceptor;<br>Halogen |
| A:GLY259:HN<br>- d:RES1:F36       | 1.883<br>87 | Hydro<br>gen<br>Bond;<br>Halog<br>en | Conventi<br>onal<br>Hydroge<br>n Bond;Hal<br>ogen<br>(Fluorine<br>) | A:GLY<br>259:H<br>N   | H-<br>Donor;H<br>alogen<br>Accepto<br>r | d:RES1:F3<br>6 | H-<br>Acceptor;<br>Halogen |

|                            |         |               |                            |               |                  |             |             |
|----------------------------|---------|---------------|----------------------------|---------------|------------------|-------------|-------------|
| A:GLN266:HE22 - d:RES1:O12 | 2.225   | Hydrogen Bond | Conventional Hydrogen Bond | A:GLN266:HE22 | H-Donor          | d:RES1:O12  | H-Acceptor  |
| d:RES1:H48 - A:ASP48:OD2   | 1.71608 | Hydrogen Bond | Conventional Hydrogen Bond | d:RES1:H48    | H-Donor          | A:ASP48:OD2 | H-Acceptor  |
| d:RES1:H49 - A:ASP48:O     | 2.49765 | Hydrogen Bond | Conventional Hydrogen Bond | d:RES1:H49    | H-Donor          | A:ASP48:O   | H-Acceptor  |
| A:ASP48:OD2 - d:RES1:F29   | 3.38929 | Halogen       | Halogen (Fluorine)         | A:ASP48:OD2   | Halogen Acceptor | d:RES1:F29  | Halogen     |
| A:ASP48:OD2 - d:RES1:F30   | 3.34295 | Halogen       | Halogen (Fluorine)         | A:ASP48:OD2   | Halogen Acceptor | d:RES1:F30  | Halogen     |
| A:ARG254:CZ - d:RES1:F36   | 3.67026 | Halogen       | Halogen (Fluorine)         | A:ARG254:CZ   | Halogen Acceptor | d:RES1:F36  | Halogen     |
| A:ALA217:CB - d:RES1       | 3.56832 | Hydrophobic   | Pi-Sigma                   | A:ALA217:CB   | C-H              | d:RES1      | Pi-Orbitals |
| A:MET258:SD - d:RES1       | 5.7646  | Other         | Pi-Sulfur                  | A:MET258:SD   | Sulfur           | d:RES1      | Pi-Orbitals |
| A:MET258:SD - d:RES1       | 4.57383 | Other         | Pi-Sulfur                  | A:MET258:SD   | Sulfur           | d:RES1      | Pi-Orbitals |
| A:PHE182 - d:RES1          | 4.82537 | Hydrophobic   | Pi-Pi Stacked              | A:PHE182      | Pi-Orbitals      | d:RES1      | Pi-Orbitals |
| d:RES1 - A:ILE219          | 5.24073 | Hydrophobic   | Pi-Alkyl                   | d:RES1        | Pi-Orbitals      | A:ILE219    | Alkyl       |
| d:RES1 - A:VAL49           | 5.26322 | Hydrophobic   | Pi-Alkyl                   | d:RES1        | Pi-Orbitals      | A:VAL49     | Alkyl       |
| d:RES1 - A:ILE219          | 5.47797 | Hydrophobic   | Pi-Alkyl                   | d:RES1        | Pi-Orbitals      | A:ILE219    | Alkyl       |

#### Non-bond interaction of **Compound 5**

| Name | Distance | Category | Types | From | From chemistry | To | To chemistry |
|------|----------|----------|-------|------|----------------|----|--------------|
|------|----------|----------|-------|------|----------------|----|--------------|

|                                   |             |                                      |                                                                        |               |                                         |              |                            |
|-----------------------------------|-------------|--------------------------------------|------------------------------------------------------------------------|---------------|-----------------------------------------|--------------|----------------------------|
| d:RES1:S1 -<br>A:ASP181:OD2       | 3.444<br>47 | Electro<br>static                    | Attractive Charge                                                      | d:RES1:S1     | Positive                                | A:ASP181:OD2 | Negative                   |
| A:LYS120:HZ2<br>- d:RES1:F38      | 2.096<br>17 | Hydro<br>gen<br>Bond;<br>Halog<br>en | Conventi<br>onal<br>Hydroge<br>n<br>Bond;Hal<br>ogen<br>(Fluorine<br>) | A:LYS120:HZ2  | H-<br>Donor;H<br>alogen<br>Accepto<br>r | d:RES1:F38   | H-<br>Acceptor;<br>Halogen |
| A:PHE182:HN<br>- d:RES1:O12       | 2.467<br>37 | Hydro<br>gen<br>Bond                 | Conventi<br>onal<br>Hydroge<br>n Bond                                  | A:PHE182:HN   | H-<br>Donor                             | d:RES1:O12   | H-<br>Acceptor             |
| A:SER216:HN<br>- d:RES1:O14       | 1.835<br>89 | Hydro<br>gen<br>Bond                 | Conventi<br>onal<br>Hydroge<br>n Bond                                  | A:SER216:HN   | H-<br>Donor                             | d:RES1:O14   | H-<br>Acceptor             |
| A:ALA217:HN<br>- d:RES1:O13       | 2.417<br>79 | Hydro<br>gen<br>Bond                 | Conventi<br>onal<br>Hydroge<br>n Bond                                  | A:ALA217:HN   | H-<br>Donor                             | d:RES1:O13   | H-<br>Acceptor             |
| A:GLY218:HN<br>- d:RES1:O13       | 2.918<br>72 | Hydro<br>gen<br>Bond                 | Conventi<br>onal<br>Hydroge<br>n Bond                                  | A:GLY218:HN   | H-<br>Donor                             | d:RES1:O13   | H-<br>Acceptor             |
| A:ILE219:HN -<br>d:RES1:O13       | 2.597<br>88 | Hydro<br>gen<br>Bond                 | Conventi<br>onal<br>Hydroge<br>n Bond                                  | A:ILE219:HN   | H-<br>Donor                             | d:RES1:O13   | H-<br>Acceptor             |
| A:GLY220:HN<br>- d:RES1:O13       | 2.222<br>76 | Hydro<br>gen<br>Bond                 | Conventi<br>onal<br>Hydroge<br>n Bond                                  | A:GLY220:HN   | H-<br>Donor                             | d:RES1:O13   | H-<br>Acceptor             |
| A:ARG221:HH<br>21 -<br>d:RES1:O14 | 1.773<br>49 | Hydro<br>gen<br>Bond                 | Conventi<br>onal<br>Hydroge<br>n Bond                                  | A:ARG221:HH21 | H-<br>Donor                             | d:RES1:O14   | H-<br>Acceptor             |
| A:GLN266:HE2<br>2 -<br>d:RES1:O12 | 1.923<br>05 | Hydro<br>gen<br>Bond                 | Conventi<br>onal<br>Hydroge<br>n Bond                                  | A:GLN266:HE22 | H-<br>Donor                             | d:RES1:O12   | H-<br>Acceptor             |
| d:RES1:O13 -<br>A:CYS215:SG       | 2.941<br>81 | Hydro<br>gen                         | Conventi<br>onal                                                       | d:RES1:O13    | H-<br>Donor                             | A:CYS215:SG  | H-<br>Acceptor             |

|                          |         |               |                            |             |             |             |             |
|--------------------------|---------|---------------|----------------------------|-------------|-------------|-------------|-------------|
|                          |         | Bond          | Hydrogen Bond              |             |             |             |             |
| d:RES1:H51 - A:ASP48:OD2 | 2.07156 | Hydrogen Bond | Conventional Hydrogen Bond | d:RES1:H51  | H-Donor     | A:ASP48:OD2 | H-Acceptor  |
| d:RES1:H52 - A:ASP48:OD2 | 2.06956 | Hydrogen Bond | Conventional Hydrogen Bond | d:RES1:H52  | H-Donor     | A:ASP48:OD2 | H-Acceptor  |
| d:RES1:S28 - A:ASP48:OD1 | 3.23241 | Other         | Sulfur-X                   | d:RES1:S28  | Sulfur      | A:ASP48:OD1 | O,N,S       |
| d:RES1:S28 - A:ASP48:OD2 | 3.29681 | Other         | Sulfur-X                   | d:RES1:S28  | Sulfur      | A:ASP48:OD2 | O,N,S       |
| A:ASP48:OD1 - d:RES1     | 4.59065 | Electrostatic | Pi-Anion                   | A:ASP48:OD1 | Negative    | d:RES1      | Pi-Orbitals |
| A:VAL49:CG2 - d:RES1     | 3.82716 | Hydrophobic   | Pi-Sigma                   | A:VAL49:CG2 | C-H         | d:RES1      | Pi-Orbitals |
| A:ALA217:CB - d:RES1     | 3.46346 | Hydrophobic   | Pi-Sigma                   | A:ALA217:CB | C-H         | d:RES1      | Pi-Orbitals |
| d:RES1:S28 - d:RES1      | 5.7457  | Other         | Pi-Sulfur                  | d:RES1:S28  | Sulfur      | d:RES1      | Pi-Orbitals |
| A:PHE182 - d:RES1        | 4.83766 | Hydrophobic   | Pi-Pi Stacked              | A:PHE182    | Pi-Orbitals | d:RES1      | Pi-Orbitals |
| d:RES1 - d:RES1          | 4.87603 | Hydrophobic   | Pi-Pi Stacked              | d:RES1      | Pi-Orbitals | d:RES1      | Pi-Orbitals |
| A:TYR46 - d:RES1         | 4.68475 | Hydrophobic   | Pi-Pi T-shaped             | A:TYR46     | Pi-Orbitals | d:RES1      | Pi-Orbitals |
| d:RES1 - A:TYR46         | 4.72465 | Hydrophobic   | Pi-Pi T-shaped             | d:RES1      | Pi-Orbitals | A:TYR46     | Pi-Orbitals |
| d:RES1 - A:ILE219        | 5.33424 | Hydrophobic   | Pi-Alkyl                   | d:RES1      | Pi-Orbitals | A:ILE219    | Alkyl       |
| d:RES1 - A:VAL49         | 5.4911  | Hydrophobic   | Pi-Alkyl                   | d:RES1      | Pi-Orbitals | A:VAL49     | Alkyl       |
| d:RES1 - A:MET258        | 4.78396 | Hydrophobic   | Pi-Alkyl                   | d:RES1      | Pi-Orbitals | A:MET258    | Alkyl       |

#### Non-bond interaction of **Compound 6**

| Name | Dist | Categ | Types | From | From | To | To |
|------|------|-------|-------|------|------|----|----|
|------|------|-------|-------|------|------|----|----|

|                                   |             |                      |                                       |                       |               |                  |                |
|-----------------------------------|-------------|----------------------|---------------------------------------|-----------------------|---------------|------------------|----------------|
|                                   | nce         | ory                  |                                       |                       | chemistr<br>y |                  | chemistry      |
| d:RES1:S1 -<br>A:ASP181:OD2       | 3.517<br>72 | Electro<br>static    | Attractiv<br>e Charge                 | d:RES<br>1:S1         | Positive      | A:ASP181:<br>OD2 | Negative       |
| A:SER216:HN<br>- d:RES1:O14       | 1.792<br>74 | Hydro<br>gen<br>Bond | Conventi<br>onal<br>Hydroge<br>n Bond | A:SER<br>216:H<br>N   | H-<br>Donor   | d:RES1:O<br>14   | H-<br>Acceptor |
| A:GLY218:HN<br>- d:RES1:O13       | 2.876<br>58 | Hydro<br>gen<br>Bond | Conventi<br>onal<br>Hydroge<br>n Bond | A:GLY<br>218:H<br>N   | H-<br>Donor   | d:RES1:O<br>13   | H-<br>Acceptor |
| A:ILE219:HN -<br>d:RES1:O13       | 2.616<br>24 | Hydro<br>gen<br>Bond | Conventi<br>onal<br>Hydroge<br>n Bond | A:ILE2<br>19:HN       | H-<br>Donor   | d:RES1:O<br>13   | H-<br>Acceptor |
| A:GLY220:HN<br>- d:RES1:O13       | 2.326<br>58 | Hydro<br>gen<br>Bond | Conventi<br>onal<br>Hydroge<br>n Bond | A:GLY<br>220:H<br>N   | H-<br>Donor   | d:RES1:O<br>13   | H-<br>Acceptor |
| A:ARG221:HH<br>21 -<br>d:RES1:O14 | 1.920<br>85 | Hydro<br>gen<br>Bond | Conventi<br>onal<br>Hydroge<br>n Bond | A:ARG<br>221:H<br>H21 | H-<br>Donor   | d:RES1:O<br>14   | H-<br>Acceptor |
| A:GLN266:HE2<br>2 -<br>d:RES1:O12 | 2.043<br>78 | Hydro<br>gen<br>Bond | Conventi<br>onal<br>Hydroge<br>n Bond | A:GLN<br>266:H<br>E22 | H-<br>Donor   | d:RES1:O<br>12   | H-<br>Acceptor |
| d:RES1:H48 -<br>A:ASP48:OD2       | 1.713<br>7  | Hydro<br>gen<br>Bond | Conventi<br>onal<br>Hydroge<br>n Bond | d:RES<br>1:H48        | H-<br>Donor   | A:ASP48:<br>OD2  | H-<br>Acceptor |
| d:RES1:H49 -<br>A:ASP48:OD2       | 2.183<br>92 | Hydro<br>gen<br>Bond | Conventi<br>onal<br>Hydroge<br>n Bond | d:RES<br>1:H49        | H-<br>Donor   | A:ASP48:<br>OD2  | H-<br>Acceptor |
| A:ASP48:OD1<br>- d:RES1           | 4.613<br>38 | Electro<br>static    | Pi-Anion                              | A:ASP<br>48:OD<br>1   | Negativ<br>e  | d:RES1           | Pi-Orbitals    |
| A:VAL49:CG2 -<br>d:RES1           | 3.816<br>57 | Hydro<br>phobic      | Pi-Sigma                              | A:VAL<br>49:CG<br>2   | C-H           | d:RES1           | Pi-Orbitals    |
| A:ALA217:CB -<br>d:RES1           | 3.656<br>62 | Hydro<br>phobic      | Pi-Sigma                              | A:ALA<br>217:C        | C-H           | d:RES1           | Pi-Orbitals    |

|                          |             |                 |                  |                |                 |          |             |
|--------------------------|-------------|-----------------|------------------|----------------|-----------------|----------|-------------|
|                          |             |                 |                  | B              |                 |          |             |
| d:RES1:S27 -<br>A:PHE182 | 5.818<br>46 | Other           | Pi-Sulfur        | d:RES<br>1:S27 | Sulfur          | A:PHE182 | Pi-Orbitals |
| A:PHE182 -<br>d:RES1     | 4.687<br>02 | Hydro<br>phobic | Pi-Pi<br>Stacked | A:PHE<br>182   | Pi-<br>Orbitals | d:RES1   | Pi-Orbitals |
| d:RES1 -<br>d:RES1       | 4.524<br>66 | Hydro<br>phobic | Pi-Pi<br>Stacked | d:RES<br>1     | Pi-<br>Orbitals | d:RES1   | Pi-Orbitals |
| d:RES1 -<br>A:VAL49      | 5.250<br>4  | Hydro<br>phobic | Pi-Alkyl         | d:RES<br>1     | Pi-<br>Orbitals | A:VAL49  | Alkyl       |
| d:RES1 -<br>A:MET258     | 4.694<br>37 | Hydro<br>phobic | Pi-Alkyl         | d:RES<br>1     | Pi-<br>Orbitals | A:MET258 | Alkyl       |

#### Non-bond interaction of **Compound 7**

| Name                              | Distance    | Category             | Types                                 | From                  | From chemistry | To             | To chemistry   |
|-----------------------------------|-------------|----------------------|---------------------------------------|-----------------------|----------------|----------------|----------------|
| A:CYS215:HG<br>- d:RES1:O17       | 1.984<br>83 | Hydro<br>gen<br>Bond | Conventi<br>onal<br>Hydroge<br>n Bond | A:CYS<br>215:H<br>G   | H-<br>Donor    | d:RES1:O<br>17 | H-<br>Acceptor |
| A:SER216:HN<br>- d:RES1:O18       | 2.409<br>73 | Hydro<br>gen<br>Bond | Conventi<br>onal<br>Hydroge<br>n Bond | A:SER<br>216:H<br>N   | H-<br>Donor    | d:RES1:O<br>18 | H-<br>Acceptor |
| A:ALA217:HN<br>- d:RES1:O16       | 2.056<br>41 | Hydro<br>gen<br>Bond | Conventi<br>onal<br>Hydroge<br>n Bond | A:ALA<br>217:H<br>N   | H-<br>Donor    | d:RES1:O<br>16 | H-<br>Acceptor |
| A:GLY218:HN<br>- d:RES1:O16       | 3.055<br>22 | Hydro<br>gen<br>Bond | Conventi<br>onal<br>Hydroge<br>n Bond | A:GLY<br>218:H<br>N   | H-<br>Donor    | d:RES1:O<br>16 | H-<br>Acceptor |
| A:ARG221:HH<br>22 -<br>d:RES1:O18 | 1.767<br>63 | Hydro<br>gen<br>Bond | Conventi<br>onal<br>Hydroge<br>n Bond | A:ARG<br>221:H<br>H22 | H-<br>Donor    | d:RES1:O<br>18 | H-<br>Acceptor |
| A:ARG254:HH<br>11 -<br>d:RES1:O28 | 1.790<br>3  | Hydro<br>gen<br>Bond | Conventi<br>onal<br>Hydroge<br>n Bond | A:ARG<br>254:H<br>H11 | H-<br>Donor    | d:RES1:O<br>28 | H-<br>Acceptor |
| A:ARG254:HH                       | 1.942       | Hydro                | Conventi                              | A:ARG                 | H-             | d:RES1:O       | H-             |

|                           |   |             |                      |                                       |                     |                 |                 |                |
|---------------------------|---|-------------|----------------------|---------------------------------------|---------------------|-----------------|-----------------|----------------|
| 21<br>d:RES1:O29          | - | 32          | gen<br>Bond          | onal<br>Hydroge<br>n Bond             | 254:H<br>H21        | Donor           | 29              | Acceptor       |
| d:RES1:H42<br>A:TYR20:OH  | - | 2.247       | Hydro<br>gen<br>Bond | Conventi<br>onal<br>Hydroge<br>n Bond | d:RES<br>1:H42      | H-<br>Donor     | A:TYR20:<br>OH  | H-<br>Acceptor |
| A:SER216:CB<br>d:RES1:O18 | - | 2.870<br>8  | Hydro<br>gen<br>Bond | Carbon<br>Hydroge<br>n Bond           | A:SER<br>216:C<br>B | H-<br>Donor     | d:RES1:O<br>18  | H-<br>Acceptor |
| A:ALA217:CB<br>d:RES1     | - | 3.741<br>62 | Hydro<br>phobic      | Pi-<br>Sigma                          | A:ALA<br>217:C<br>B | C-H             | d:RES1          | Pi-Orbitals    |
| A:PHE182<br>d:RES1        | - | 4.639<br>59 | Hydro<br>phobic      | Pi-Pi<br>Stacked                      | A:PHE<br>182        | Pi-<br>Orbitals | d:RES1          | Pi-Orbitals    |
| A:PHE182<br>d:RES1        | - | 5.905<br>62 | Hydro<br>phobic      | Pi-Pi<br>Stacked                      | A:PHE<br>182        | Pi-<br>Orbitals | d:RES1          | Pi-Orbitals    |
| A:TYR46<br>d:RES1         | - | 5.045<br>55 | Hydro<br>phobic      | Pi-Pi T-<br>shaped                    | A:TYR<br>46         | Pi-<br>Orbitals | d:RES1          | Pi-Orbitals    |
| A:TYR46<br>d:RES1         | - | 5.118<br>13 | Hydro<br>phobic      | Pi-Pi T-<br>shaped                    | A:TYR<br>46         | Pi-<br>Orbitals | d:RES1          | Pi-Orbitals    |
| d:RES1:Br11<br>A:LYS120   | - | 4.754<br>97 | Hydro<br>phobic      | Alkyl                                 | d:RES<br>1:Br11     | Alkyl           | A:LYS120        | Alkyl          |
| A:TYR46<br>d:RES1:Br11    | - | 5.213<br>28 | Hydro<br>phobic      | Pi-Alkyl                              | A:TYR<br>46         | Pi-<br>Orbitals | d:RES1:Br<br>11 | Alkyl          |
| A:PHE182<br>d:RES1:Br11   | - | 5.292<br>24 | Hydro<br>phobic      | Pi-Alkyl                              | A:PHE<br>182        | Pi-<br>Orbitals | d:RES1:Br<br>11 | Alkyl          |
| d:RES1<br>A:VAL49         | - | 5.094<br>28 | Hydro<br>phobic      | Pi-Alkyl                              | d:RES<br>1          | Pi-<br>Orbitals | A:VAL49         | Alkyl          |
| d:RES1<br>A:ALA217        | - | 4.197<br>49 | Hydro<br>phobic      | Pi-Alkyl                              | d:RES<br>1          | Pi-<br>Orbitals | A:ALA217        | Alkyl          |

#### Non-bond interaction of **Compound 8**

| Name                         | Distance    | Category                         | Types                                                | From                | From chemistry                      | To             | To chemistry               |
|------------------------------|-------------|----------------------------------|------------------------------------------------------|---------------------|-------------------------------------|----------------|----------------------------|
| A: PHE182:HN<br>- d:RES1:F15 | 2.884<br>29 | Hydro<br>gen<br>Bond;<br>Halogen | Conventi<br>onal<br>Hydroge<br>n<br>Bond;Hal<br>ogen | A:PHE<br>182:H<br>N | H-<br>Donor;H<br>alogen<br>Acceptor | d:RES1:F1<br>5 | H-<br>Acceptor;<br>Halogen |

|                            |         |               |                            |               |             |             |             |
|----------------------------|---------|---------------|----------------------------|---------------|-------------|-------------|-------------|
|                            |         |               | (Fluorine )                |               |             |             |             |
| A:SER216:HN - d:RES1:O18   | 2.49643 | Hydrogen Bond | Conventional Hydrogen Bond | A:SER216:HN   | H-Donor     | d:RES1:O18  | H-Acceptor  |
| A:ALA217:HN - d:RES1:O18   | 2.69875 | Hydrogen Bond | Conventional Hydrogen Bond | A:ALA217:HN   | H-Donor     | d:RES1:O18  | H-Acceptor  |
| A:ALA217:HN - d:RES1:O16   | 2.57133 | Hydrogen Bond | Conventional Hydrogen Bond | A:ALA217:HN   | H-Donor     | d:RES1:O16  | H-Acceptor  |
| A:ARG221:HE - d:RES1:O17   | 2.24031 | Hydrogen Bond | Conventional Hydrogen Bond | A:ARG221:HE   | H-Donor     | d:RES1:O17  | H-Acceptor  |
| A:ARG221:HH22 - d:RES1:O18 | 2.15995 | Hydrogen Bond | Conventional Hydrogen Bond | A:ARG221:HH22 | H-Donor     | d:RES1:O18  | H-Acceptor  |
| A:GLN262:HE22 - d:RES1:N21 | 2.59843 | Hydrogen Bond | Conventional Hydrogen Bond | A:GLN262:HE22 | H-Donor     | d:RES1:N21  | H-Acceptor  |
| A:SER216:CB - d:RES1:O18   | 3.09853 | Hydrogen Bond | Carbon Hydrogen Bond       | A:SER216:CB   | H-Donor     | d:RES1:O18  | H-Acceptor  |
| A:ALA217:CB - d:RES1       | 3.77669 | Hydrophobic   | Pi-Sigma                   | A:ALA217:CB   | C-H         | d:RES1      | Pi-Orbitals |
| A:PHE182 - d:RES1          | 4.63656 | Hydrophobic   | Pi-Pi Stacked              | A:PHE182      | Pi-Orbitals | d:RES1      | Pi-Orbitals |
| A:TYR46 - d:RES1           | 4.79921 | Hydrophobic   | Pi-Pi T-shaped             | A:TYR46       | Pi-Orbitals | d:RES1      | Pi-Orbitals |
| A:TYR46 - d:RES1           | 4.99751 | Hydrophobic   | Pi-Pi T-shaped             | A:TYR46       | Pi-Orbitals | d:RES1      | Pi-Orbitals |
| d:RES1:Br11 - A:LYS120     | 4.9362  | Hydrophobic   | Alkyl                      | d:RES1:Br11   | Alkyl       | A:LYS120    | Alkyl       |
| A:PHE182 - d:RES1:Br11     | 4.99439 | Hydrophobic   | Pi-Alkyl                   | A:PHE182      | Pi-Orbitals | d:RES1:Br11 | Alkyl       |
| d:RES1 - A:VAL49           | 5.03501 | Hydrophobic   | Pi-Alkyl                   | d:RES1        | Pi-Orbitals | A:VAL49     | Alkyl       |



|                    |        |       |                 |          |            |                 |          |       |
|--------------------|--------|-------|-----------------|----------|------------|-----------------|----------|-------|
| d:RES1<br>A:ALA217 | -<br>3 | 4.199 | Hydro<br>phobic | Pi-Alkyl | d:RES<br>1 | Pi-<br>Orbitals | A:ALA217 | Alkyl |
|--------------------|--------|-------|-----------------|----------|------------|-----------------|----------|-------|

### Non-bond interaction of **Compound 9**

| Name                              | Distance    | Category             | Types                                 | From                  | From chemistry  | To             | To chemistry   |
|-----------------------------------|-------------|----------------------|---------------------------------------|-----------------------|-----------------|----------------|----------------|
| A:PHE182:HN<br>- d:RES1:O15       | 1.924<br>64 | Hydro<br>gen<br>Bond | Conventi<br>onal<br>Hydroge<br>n Bond | A:PHE<br>182:H<br>N   | H-<br>Donor     | d:RES1:O<br>15 | H-<br>Acceptor |
| A:ARG221:HN<br>- d:RES1:O14       | 1.988<br>63 | Hydro<br>gen<br>Bond | Conventi<br>onal<br>Hydroge<br>n Bond | A:ARG<br>221:H<br>N   | H-<br>Donor     | d:RES1:O<br>14 | H-<br>Acceptor |
| A:ARG221:HE<br>- d:RES1:O14       | 2.127<br>91 | Hydro<br>gen<br>Bond | Conventi<br>onal<br>Hydroge<br>n Bond | A:ARG<br>221:H<br>E   | H-<br>Donor     | d:RES1:O<br>14 | H-<br>Acceptor |
| A:GLN266:HE2<br>1 -<br>d:RES1:O15 | 2.780<br>26 | Hydro<br>gen<br>Bond | Conventi<br>onal<br>Hydroge<br>n Bond | A:GLN<br>266:H<br>E21 | H-<br>Donor     | d:RES1:O<br>15 | H-<br>Acceptor |
| A:ALA217:CB -<br>d:RES1           | 3.991<br>95 | Hydro<br>phobic      | Pi-<br>Sigma                          | A:ALA<br>217:C<br>B   | C-H             | d:RES1         | Pi-Orbitals    |
| d:RES1 -<br>A:TYR46               | 4.746<br>13 | Hydro<br>phobic      | Pi-Pi<br>Stacked                      | d:RES<br>1            | Pi-<br>Orbitals | A:TYR46        | Pi-Orbitals    |
| A:TYR46 -<br>d:RES1               | 5.001<br>48 | Hydro<br>phobic      | Pi-Pi T-<br>shaped                    | A:TYR<br>46           | Pi-<br>Orbitals | d:RES1         | Pi-Orbitals    |
| A:VAL49 -<br>d:RES1               | 5.292<br>64 | Hydro<br>phobic      | Alkyl                                 | A:VAL<br>49           | Alkyl           | d:RES1         | Alkyl          |
| A:ALA217 -<br>d:RES1:Br7          | 3.405<br>13 | Hydro<br>phobic      | Alkyl                                 | A:ALA<br>217          | Alkyl           | d:RES1:Br<br>7 | Alkyl          |
| d:RES1:Br7 -<br>A:ILE219          | 4.134<br>75 | Hydro<br>phobic      | Alkyl                                 | d:RES<br>1:Br7        | Alkyl           | A:ILE219       | Alkyl          |
| d:RES1 -<br>A:MET258              | 5.216<br>94 | Hydro<br>phobic      | Alkyl                                 | d:RES<br>1            | Alkyl           | A:MET258       | Alkyl          |
| d:RES1:C30 -<br>A:ILE219          | 5.032<br>11 | Hydro<br>phobic      | Alkyl                                 | d:RES<br>1:C30        | Alkyl           | A:ILE219       | Alkyl          |
| d:RES1:C31 -                      | 3.528       | Hydro                | Alkyl                                 | d:RES                 | Alkyl           | A:VAL49        | Alkyl          |

|                          |             |                 |          |                |                 |          |       |
|--------------------------|-------------|-----------------|----------|----------------|-----------------|----------|-------|
| A:VAL49                  | 13          | phobic          |          | 1:C31          |                 |          |       |
| d:RES1:C31 -<br>A:ILE219 | 4.071<br>41 | Hydro<br>phobic | Alkyl    | d:RES<br>1:C31 | Alkyl           | A:ILE219 | Alkyl |
| d:RES1:C31 -<br>A:MET258 | 4.082<br>15 | Hydro<br>phobic | Alkyl    | d:RES<br>1:C31 | Alkyl           | A:MET258 | Alkyl |
| d:RES1 -<br>A:VAL49      | 4.891<br>74 | Hydro<br>phobic | Pi-Alkyl | d:RES<br>1     | Pi-<br>Orbitals | A:VAL49  | Alkyl |
| d:RES1 -<br>A:ALA217     | 5.116<br>47 | Hydro<br>phobic | Pi-Alkyl | d:RES<br>1     | Pi-<br>Orbitals | A:ALA217 | Alkyl |

#### Non-bond interaction of **Compound 10**

| Name                              | Distance    | Category             | Types                                 | From                  | From chemistry  | To             | To chemistry   |
|-----------------------------------|-------------|----------------------|---------------------------------------|-----------------------|-----------------|----------------|----------------|
| A:PHE182:HN<br>- d:RES1:O15       | 1.900<br>44 | Hydro<br>gen<br>Bond | Conventi<br>onal<br>Hydroge<br>n Bond | A:PHE<br>182:H<br>N   | H-<br>Donor     | d:RES1:O<br>15 | H-<br>Acceptor |
| A:ARG221:HN<br>- d:RES1:O14       | 1.983<br>59 | Hydro<br>gen<br>Bond | Conventi<br>onal<br>Hydroge<br>n Bond | A:ARG<br>221:H<br>N   | H-<br>Donor     | d:RES1:O<br>14 | H-<br>Acceptor |
| A:ARG221:HE<br>- d:RES1:O14       | 1.991<br>6  | Hydro<br>gen<br>Bond | Conventi<br>onal<br>Hydroge<br>n Bond | A:ARG<br>221:H<br>E   | H-<br>Donor     | d:RES1:O<br>14 | H-<br>Acceptor |
| A:GLN266:HE2<br>1 -<br>d:RES1:O15 | 2.750<br>06 | Hydro<br>gen<br>Bond | Conventi<br>onal<br>Hydroge<br>n Bond | A:GLN<br>266:H<br>E21 | H-<br>Donor     | d:RES1:O<br>15 | H-<br>Acceptor |
| A:ARG254:NH<br>1 - d:RES1         | 4.024<br>98 | Electro<br>static    | Pi-<br>Cation                         | A:ARG<br>254:N<br>H1  | Positive        | d:RES1         | Pi-Orbitals    |
| A:ALA27:CB -<br>d:RES1            | 3.641<br>67 | Hydro<br>phobic      | Pi-<br>Sigma                          | A:ALA<br>27:CB        | C-H             | d:RES1         | Pi-Orbitals    |
| d:RES1 -<br>A:TYR46               | 4.830<br>57 | Hydro<br>phobic      | Pi-Pi<br>Stacked                      | d:RES<br>1            | Pi-<br>Orbitals | A:TYR46        | Pi-Orbitals    |
| A:TYR46 -<br>d:RES1               | 4.832       | Hydro<br>phobic      | Pi-Pi T-<br>shaped                    | A:TYR<br>46           | Pi-<br>Orbitals | d:RES1         | Pi-Orbitals    |
| A:ALA217 -<br>d:RES1:Br7          | 3.429<br>99 | Hydro<br>phobic      | Alkyl                                 | A:ALA<br>217          | Alkyl           | d:RES1:Br<br>7 | Alkyl          |
| d:RES1:Br7 -<br>A:ILE219          | 4.182<br>32 | Hydro<br>phobic      | Alkyl                                 | d:RES<br>1:Br7        | Alkyl           | A:ILE219       | Alkyl          |

|                    |   |             |                 |          |            |                 |          |       |
|--------------------|---|-------------|-----------------|----------|------------|-----------------|----------|-------|
| d:RES1<br>A:VAL49  | - | 5.037<br>08 | Hydro<br>phobic | Pi-Alkyl | d:RES<br>1 | Pi-<br>Orbitals | A:VAL49  | Alkyl |
| d:RES1<br>A:ALA217 | - | 5.109<br>52 | Hydro<br>phobic | Pi-Alkyl | d:RES<br>1 | Pi-<br>Orbitals | A:ALA217 | Alkyl |
| d:RES1<br>A:ALA217 | - | 4.031<br>2  | Hydro<br>phobic | Pi-Alkyl | d:RES<br>1 | Pi-<br>Orbitals | A:ALA217 | Alkyl |

#### Non-bond interaction of **Compound 11**

| Name                              |   | Distance    | Category                                   | Types                                           | From                  | From chemistry           | To             | To chemistry                    |
|-----------------------------------|---|-------------|--------------------------------------------|-------------------------------------------------|-----------------------|--------------------------|----------------|---------------------------------|
| A:PHE182:HN<br>- d:RES1:O15       |   | 2.070<br>63 | Hydro<br>gen<br>Bond                       | Conventi<br>onal<br>Hydroge<br>n Bond           | A:PHE<br>182:H<br>N   | H-<br>Donor              | d:RES1:O<br>15 | H-<br>Acceptor                  |
| A:ARG221:HN<br>- d:RES1:O14       |   | 1.984<br>72 | Hydro<br>gen<br>Bond                       | Conventi<br>onal<br>Hydroge<br>n Bond           | A:ARG<br>221:H<br>N   | H-<br>Donor              | d:RES1:O<br>14 | H-<br>Acceptor                  |
| A:ARG221:HE<br>- d:RES1:O14       |   | 1.992<br>69 | Hydro<br>gen<br>Bond                       | Conventi<br>onal<br>Hydroge<br>n Bond           | A:ARG<br>221:H<br>E   | H-<br>Donor              | d:RES1:O<br>14 | H-<br>Acceptor                  |
| A:GLN266:HE2<br>1 -<br>d:RES1:O15 |   | 2.406<br>52 | Hydro<br>gen<br>Bond                       | Conventi<br>onal<br>Hydroge<br>n Bond           | A:GLN<br>266:H<br>E21 | H-<br>Donor              | d:RES1:O<br>15 | H-<br>Acceptor                  |
| A:ARG24:NH2<br>- d:RES1           |   | 4.022<br>55 | Hydro<br>gen<br>Bond;E<br>lectros<br>tatic | Pi-<br>Cation;Pi<br>-Donor<br>Hydroge<br>n Bond | A:ARG<br>24:NH<br>2   | Positive;<br>H-<br>Donor | d:RES1         | Pi-<br>Orbitals;Pi<br>-Orbitals |
| d:RES1<br>A:TYR46                 | - | 4.794<br>78 | Hydro<br>phobic                            | Pi-Pi<br>Stacked                                | d:RES<br>1            | Pi-<br>Orbitals          | A:TYR46        | Pi-Orbitals                     |
| A:TYR46<br>d:RES1                 | - | 4.685<br>65 | Hydro<br>phobic                            | Pi-Pi T-<br>shaped                              | A:TYR<br>46           | Pi-<br>Orbitals          | d:RES1         | Pi-Orbitals                     |
| A:VAL49<br>d:RES1                 | - | 5.463<br>71 | Hydro<br>phobic                            | Alkyl                                           | A:VAL<br>49           | Alkyl                    | d:RES1         | Alkyl                           |
| A:ALA217<br>d:RES1:Br7            | - | 3.446<br>57 | Hydro<br>phobic                            | Alkyl                                           | A:ALA<br>217          | Alkyl                    | d:RES1:Br<br>7 | Alkyl                           |
| d:RES1:Br7<br>A:ILE219            | - | 4.230<br>77 | Hydro<br>phobic                            | Alkyl                                           | d:RES<br>1:Br7        | Alkyl                    | A:ILE219       | Alkyl                           |
| d:RES1                            | - | 5.069       | Hydro                                      | Pi-Alkyl                                        | d:RES                 | Pi-                      | A:VAL49        | Alkyl                           |

|                      |  |             |                 |          |            |                 |          |       |
|----------------------|--|-------------|-----------------|----------|------------|-----------------|----------|-------|
| A:VAL49              |  | 03          | phobic          |          | 1          | Orbitals        |          |       |
| d:RES1 -<br>A:ALA217 |  | 5.088<br>48 | Hydro<br>phobic | Pi-Alkyl | d:RES<br>1 | Pi-<br>Orbitals | A:ALA217 | Alkyl |
| d:RES1 -<br>A:ALA217 |  | 4.002<br>28 | Hydro<br>phobic | Pi-Alkyl | d:RES<br>1 | Pi-<br>Orbitals | A:ALA217 | Alkyl |

#### Non-bond interaction of **Compound 12**

| Name                       | Distance | Category      | Types                      | From          | From chemistry | To         | To chemistry |
|----------------------------|----------|---------------|----------------------------|---------------|----------------|------------|--------------|
| A:LYS120:HZ1 - d:RES1:O8   | 1.97889  | Hydrogen Bond | Conventional Hydrogen Bond | A:LYS120:HZ1  | H-Donor        | d:RES1:O8  | H-Acceptor   |
| A:ALA217:HN - d:RES1:O9    | 2.58127  | Hydrogen Bond | Conventional Hydrogen Bond | A:ALA217:HN   | H-Donor        | d:RES1:O9  | H-Acceptor   |
| A:ARG221:HN - d:RES1:O13   | 1.97747  | Hydrogen Bond | Conventional Hydrogen Bond | A:ARG221:HN   | H-Donor        | d:RES1:O13 | H-Acceptor   |
| A:ARG221:HE - d:RES1:O13   | 1.99251  | Hydrogen Bond | Conventional Hydrogen Bond | A:ARG221:HE   | H-Donor        | d:RES1:O13 | H-Acceptor   |
| A:ARG221:HH22 - d:RES1:O12 | 1.82381  | Hydrogen Bond | Conventional Hydrogen Bond | A:ARG221:HH22 | H-Donor        | d:RES1:O12 | H-Acceptor   |
| d:RES1:H31 - d:RES1:O8     | 2.744    | Hydrogen Bond | Conventional Hydrogen Bond | d:RES1:H31    | H-Donor        | d:RES1:O8  | H-Acceptor   |
| d:RES1:H28 - A:TYR46:OH    | 2.11313  | Hydrogen Bond | Conventional Hydrogen Bond | d:RES1:H28    | H-Donor        | A:TYR46:OH | H-Acceptor   |
| A:SER216:CB - d:RES1:O9    | 3.64962  | Hydrogen      | Carbon Hydrogen            | A:SER216:C    | H-Donor        | d:RES1:O9  | H-Acceptor   |

|                         |         | Bond          | n Bond               | B           |             |           |             |
|-------------------------|---------|---------------|----------------------|-------------|-------------|-----------|-------------|
| A:SER216:CB - d:RES1:O8 | 3.32476 | Hydrogen Bond | Carbon Hydrogen Bond | A:SER216:CB | H-Donor     | d:RES1:O8 | H-Acceptor  |
| d:RES1:S5 - A:PHE182    | 4.47513 | Other         | Pi-Sulfur            | d:RES1:S5   | Sulfur      | A:PHE182  | Pi-Orbitals |
| d:RES1 - A:TYR46        | 4.59613 | Hydrophobic   | Pi-Pi Stacked        | d:RES1      | Pi-Orbitals | A:TYR46   | Pi-Orbitals |
| d:RES1 - A:PHE182       | 4.59549 | Hydrophobic   | Pi-Pi T-shaped       | d:RES1      | Pi-Orbitals | A:PHE182  | Pi-Orbitals |
| d:RES1 - A:MET258       | 4.92314 | Hydrophobic   | Alkyl                | d:RES1      | Alkyl       | A:MET258  | Alkyl       |
| d:RES1 - A:ALA217       | 4.0488  | Hydrophobic   | Pi-Alkyl             | d:RES1      | Pi-Orbitals | A:ALA217  | Alkyl       |
| d:RES1 - A:VAL49        | 5.42147 | Hydrophobic   | Pi-Alkyl             | d:RES1      | Pi-Orbitals | A:VAL49   | Alkyl       |
| d:RES1 - A:ALA217       | 3.86353 | Hydrophobic   | Pi-Alkyl             | d:RES1      | Pi-Orbitals | A:ALA217  | Alkyl       |
| d:RES1 - A:ILE219       | 5.39874 | Hydrophobic   | Pi-Alkyl             | d:RES1      | Pi-Orbitals | A:ILE219  | Alkyl       |
| d:RES1 - A:VAL49        | 5.2762  | Hydrophobic   | Pi-Alkyl             | d:RES1      | Pi-Orbitals | A:VAL49   | Alkyl       |

#### Non-bond interaction of **Compound 13**

| Name                       | Distance | Category      | Types                      | From          | From chemistry | To         | To chemistry |
|----------------------------|----------|---------------|----------------------------|---------------|----------------|------------|--------------|
| A:PHE182:HN - d:RES1:O15   | 1.91674  | Hydrogen Bond | Conventional Hydrogen Bond | A:PHE182:HN   | H-Donor        | d:RES1:O15 | H-Acceptor   |
| A:ARG221:HN - d:RES1:O14   | 1.99523  | Hydrogen Bond | Conventional Hydrogen Bond | A:ARG221:HN   | H-Donor        | d:RES1:O14 | H-Acceptor   |
| A:ARG221:HE - d:RES1:O14   | 2.0868   | Hydrogen Bond | Conventional Hydrogen Bond | A:ARG221:HE   | H-Donor        | d:RES1:O14 | H-Acceptor   |
| A:GLN262:HE21 - d:RES1:O25 | 2.33166  | Hydrogen Bond | Conventional Hydrogen Bond | A:GLN262:HE21 | H-Donor        | d:RES1:O25 | H-Acceptor   |

|                            |         |               |                            |               |             |            |             |
|----------------------------|---------|---------------|----------------------------|---------------|-------------|------------|-------------|
|                            |         |               | n Bond                     |               |             |            |             |
| A:GLN266:HE21 - d:RES1:O15 | 2.76024 | Hydrogen Bond | Conventional Hydrogen Bond | A:GLN266:HE21 | H-Donor     | d:RES1:O15 | H-Acceptor  |
| d:RES1 - A:TYR46           | 4.78459 | Hydrophobic   | Pi-Pi Stacked              | d:RES1        | Pi-Orbitals | A:TYR46    | Pi-Orbitals |
| A:TYR46 - d:RES1           | 4.96384 | Hydrophobic   | Pi-Pi T-shaped             | A:TYR46       | Pi-Orbitals | d:RES1     | Pi-Orbitals |
| A:ALA217 - d:RES1:Br7      | 3.46536 | Hydrophobic   | Alkyl                      | A:ALA217      | Alkyl       | d:RES1:Br7 | Alkyl       |
| d:RES1:Br7 - A:ILE219      | 4.19782 | Hydrophobic   | Alkyl                      | d:RES1:Br7    | Alkyl       | A:ILE219   | Alkyl       |
| d:RES1 - A:ALA217          | 4.03234 | Hydrophobic   | Pi-Alkyl                   | d:RES1        | Pi-Orbitals | A:ALA217   | Alkyl       |
| d:RES1 - A:VAL49           | 5.02382 | Hydrophobic   | Pi-Alkyl                   | d:RES1        | Pi-Orbitals | A:VAL49    | Alkyl       |
| d:RES1 - A:ALA217          | 5.17236 | Hydrophobic   | Pi-Alkyl                   | d:RES1        | Pi-Orbitals | A:ALA217   | Alkyl       |

#### Non-bond interaction of **Compound 14**

| Name                       | Distance | Category      | Types                      | From          | From chemistry | To         | To chemistry |
|----------------------------|----------|---------------|----------------------------|---------------|----------------|------------|--------------|
| A:PHE182:HN - d:RES1:O15   | 1.88828  | Hydrogen Bond | Conventional Hydrogen Bond | A:PHE182:HN   | H-Donor        | d:RES1:O15 | H-Acceptor   |
| A:ARG221:HN - d:RES1:O14   | 1.98085  | Hydrogen Bond | Conventional Hydrogen Bond | A:ARG221:HN   | H-Donor        | d:RES1:O14 | H-Acceptor   |
| A:ARG221:HE - d:RES1:O14   | 1.98914  | Hydrogen Bond | Conventional Hydrogen Bond | A:ARG221:HE   | H-Donor        | d:RES1:O14 | H-Acceptor   |
| A:GLN266:HE21 - d:RES1:O15 | 2.76689  | Hydrogen Bond | Conventional Hydrogen Bond | A:GLN266:HE21 | H-Donor        | d:RES1:O15 | H-Acceptor   |
| d:RES1:S35 -               | 2.998    | Other         | Sulfur-X                   | d:RES         | Sulfur         | A:GLN262   | O,N,S        |

|                          |             |                                            |                                                 |                     |                          |                |                                 |
|--------------------------|-------------|--------------------------------------------|-------------------------------------------------|---------------------|--------------------------|----------------|---------------------------------|
| A:GLN262:OE1             | 98          |                                            |                                                 | 1:S35               |                          | :OE1           |                                 |
| A:ARG24:NH1<br>- d:RES1  | 3.810<br>81 | Hydro<br>gen<br>Bond;E<br>lectros<br>tatic | Pi-<br>Cation;Pi<br>-Donor<br>Hydroge<br>n Bond | A:ARG<br>24:NH<br>1 | Positive;<br>H-<br>Donor | d:RES1         | Pi-<br>Orbitals;Pi<br>-Orbitals |
| A:ALA217:CB<br>- d:RES1  | 3.971<br>8  | Hydro<br>phobic                            | Pi-<br>Sigma                                    | A:ALA<br>217:C<br>B | C-H                      | d:RES1         | Pi-Orbitals                     |
| d:RES1<br>- A:TYR46      | 4.816<br>51 | Hydro<br>phobic                            | Pi-Pi<br>Stacked                                | d:RES<br>1          | Pi-<br>Orbitals          | A:TYR46        | Pi-Orbitals                     |
| A:TYR46<br>- d:RES1      | 4.956<br>5  | Hydro<br>phobic                            | Pi-Pi T-<br>shaped                              | A:TYR<br>46         | Pi-<br>Orbitals          | d:RES1         | Pi-Orbitals                     |
| A:VAL49<br>- d:RES1      | 4.936<br>12 | Hydro<br>phobic                            | Alkyl                                           | A:VAL<br>49         | Alkyl                    | d:RES1         | Alkyl                           |
| A:ALA217<br>- d:RES1:Br7 | 3.477<br>62 | Hydro<br>phobic                            | Alkyl                                           | A:ALA<br>217        | Alkyl                    | d:RES1:Br<br>7 | Alkyl                           |
| d:RES1:Br7<br>- A:ILE219 | 4.135<br>67 | Hydro<br>phobic                            | Alkyl                                           | d:RES<br>1:Br7      | Alkyl                    | A:ILE219       | Alkyl                           |
| d:RES1<br>- A:VAL49      | 4.953<br>65 | Hydro<br>phobic                            | Pi-Alkyl                                        | d:RES<br>1          | Pi-<br>Orbitals          | A:VAL49        | Alkyl                           |
| d:RES1<br>- A:ALA217     | 5.095<br>12 | Hydro<br>phobic                            | Pi-Alkyl                                        | d:RES<br>1          | Pi-<br>Orbitals          | A:ALA217       | Alkyl                           |

#### Non-bond interaction of **Compound 15**

| Name                        | Distance    | Category             | Types                                 | From                 | From chemistry | To             | To chemistry   |
|-----------------------------|-------------|----------------------|---------------------------------------|----------------------|----------------|----------------|----------------|
| A:LYS120:HZ1<br>- d:RES1:O9 | 1.951<br>85 | Hydro<br>gen<br>Bond | Conventi<br>onal<br>Hydroge<br>n Bond | A:LYS<br>120:H<br>Z1 | H-<br>Donor    | d:RES1:O<br>9  | H-<br>Acceptor |
| A:SER216:HN<br>- d:RES1:O15 | 2.009<br>08 | Hydro<br>gen<br>Bond | Conventi<br>onal<br>Hydroge<br>n Bond | A:SER<br>216:H<br>N  | H-<br>Donor    | d:RES1:O<br>15 | H-<br>Acceptor |
| A:ARG221:HE<br>- d:RES1:O14 | 2.314<br>03 | Hydro<br>gen<br>Bond | Conventi<br>onal<br>Hydroge<br>n Bond | A:ARG<br>221:H<br>E  | H-<br>Donor    | d:RES1:O<br>14 | H-<br>Acceptor |
| A:ARG221:HH<br>22 -         | 1.820<br>26 | Hydro<br>gen         | Conventi<br>onal                      | A:ARG<br>221:H       | H-<br>Donor    | d:RES1:O<br>15 | H-<br>Acceptor |

|                          |         |               |                      |             |             |            |             |
|--------------------------|---------|---------------|----------------------|-------------|-------------|------------|-------------|
| d:RES1:O15               |         | Bond          | Hydrogen Bond        | H22         |             |            |             |
| A:SER216:CB - d:RES1:O15 | 3.06942 | Hydrogen Bond | Carbon Hydrogen Bond | A:SER216:CB | H-Donor     | d:RES1:O15 | H-Acceptor  |
| d:RES1:S5 - A:PHE182     | 4.84914 | Other         | Pi-Sulfur            | d:RES1:S5   | Sulfur      | A:PHE182   | Pi-Orbitals |
| A:TYR46 - d:RES1         | 5.19161 | Hydrophobic   | Pi-Pi T-shaped       | A:TYR46     | Pi-Orbitals | d:RES1     | Pi-Orbitals |
| A:VAL49 - d:RES1         | 5.00326 | Hydrophobic   | Alkyl                | A:VAL49     | Alkyl       | d:RES1     | Alkyl       |
| A:ALA217 - d:RES1:Br7    | 3.82901 | Hydrophobic   | Alkyl                | A:ALA217    | Alkyl       | d:RES1:Br7 | Alkyl       |
| A:ILE219 - d:RES1        | 5.14882 | Hydrophobic   | Alkyl                | A:ILE219    | Alkyl       | d:RES1     | Alkyl       |
| d:RES1:Br7 - A:ILE219    | 4.48091 | Hydrophobic   | Alkyl                | d:RES1:Br7  | Alkyl       | A:ILE219   | Alkyl       |
| d:RES1 - A:VAL49         | 5.38975 | Hydrophobic   | Pi-Alkyl             | d:RES1      | Pi-Orbitals | A:VAL49    | Alkyl       |
| d:RES1 - A:ALA217        | 4.2058  | Hydrophobic   | Pi-Alkyl             | d:RES1      | Pi-Orbitals | A:ALA217   | Alkyl       |

#### Non-bond interaction of **Compound 16**

| Name                       | Distance | Category      | Types                      | From          | From chemistry | To         | To chemistry |
|----------------------------|----------|---------------|----------------------------|---------------|----------------|------------|--------------|
| A:LYS120:HZ1 - d:RES1:O10  | 2.07912  | Hydrogen Bond | Conventional Hydrogen Bond | A:LYS120:HZ1  | H-Donor        | d:RES1:O10 | H-Acceptor   |
| A:PHE182:HN - d:RES1:O15   | 1.97342  | Hydrogen Bond | Conventional Hydrogen Bond | A:PHE182:HN   | H-Donor        | d:RES1:O15 | H-Acceptor   |
| A:ARG221:HN - d:RES1:O14   | 1.94096  | Hydrogen Bond | Conventional Hydrogen Bond | A:ARG221:HN   | H-Donor        | d:RES1:O14 | H-Acceptor   |
| A:ARG254:HH11 - d:RES1:O37 | 2.07396  | Hydrogen Bond | Conventional Hydrogen Bond | A:ARG254:HH11 | H-Donor        | d:RES1:O37 | H-Acceptor   |



|                            |         |               |                            |                |             |             |             |
|----------------------------|---------|---------------|----------------------------|----------------|-------------|-------------|-------------|
| A:ARG254:HH21 - d:RES1:O37 | 3.05455 | Hydrogen Bond | Conventional Hydrogen Bond | A:ARG254:H H21 | H-Donor     | d:RES1:O37  | H-Acceptor  |
| d:RES1:H38 - A:TYR46:OH    | 1.91662 | Hydrogen Bond | Conventional Hydrogen Bond | d:RES1:H38     | H-Donor     | A:TYR46:OH  | H-Acceptor  |
| A:ALA217:CB - d:RES1       | 3.91784 | Hydrophobic   | Pi-Sigma                   | A:ALA217:CB    | C-H         | d:RES1      | Pi-Orbitals |
| A:MET258:SD - d:RES1       | 5.4783  | Other         | Pi-Sulfur                  | A:MET258:SD    | Sulfur      | d:RES1      | Pi-Orbitals |
| d:RES1 - A:TYR46           | 4.84159 | Hydrophobic   | Pi-Pi Stacked              | d:RES1         | Pi-Orbitals | A:TYR46     | Pi-Orbitals |
| A:TYR46 - d:RES1           | 5.86068 | Hydrophobic   | Pi-Pi T-shaped             | A:TYR46        | Pi-Orbitals | d:RES1      | Pi-Orbitals |
| A:ALA217 - d:RES1:CI28     | 3.71556 | Hydrophobic   | Alkyl                      | A:ALA217       | Alkyl       | d:RES1:CI28 | Alkyl       |
| d:RES1:CI28 - A:ILE219     | 4.19694 | Hydrophobic   | Alkyl                      | d:RES1:CI28    | Alkyl       | A:ILE219    | Alkyl       |
| d:RES1 - A:VAL49           | 4.91109 | Hydrophobic   | Pi-Alkyl                   | d:RES1         | Pi-Orbitals | A:VAL49     | Alkyl       |
| d:RES1 - A:ALA217          | 5.31293 | Hydrophobic   | Pi-Alkyl                   | d:RES1         | Pi-Orbitals | A:ALA217    | Alkyl       |
| d:RES1 - A:ALA27           | 4.3449  | Hydrophobic   | Pi-Alkyl                   | d:RES1         | Pi-Orbitals | A:ALA27     | Alkyl       |
